# Supplementary material for: Classification and clustering of RNA crosslink-ligation data reveal complex structures and homodimers
Source: HighWire-hosted journal article supplement (doi:10.1101/gr.275979.121), 2022-03-24
Supplement: Supplemental_Data.zip [file DGs_5methods.xlsx]

119 LIBARCHIVE.xattr.com.apple.quarantine=MDA4MTs2MWNmODJjMjtDaHJvbWU7ODhFRDMzODMtQUYxMS00RTUwLUI5NzktQkUzNzY0QjhCRjFC
95 SCHILY.xattr.com.apple.quarantine=0081;61cf82c2;Chrome;88ED3383-AF11-4E50-B979-BE3764B8BF1B
