# Supplementary material for: Classification and clustering of RNA crosslink-ligation data reveal complex structures and homodimers
Source: HighWire-hosted journal article supplement (doi:10.1101/gr.275979.121), 2022-03-24
Supplement: Supplemental_Data.zip [file fig2K.xlsx]

## Sheet: PARIS
PARIS_bc07	All					ACTB					XIST
Raw reads	Bowtie2_hyb	Bowtie2_Aligater	STAR_default	STAR_new		Bowtie2_hyb	Bowtie2_Aligater	STAR_default	STAR_new		Bowtie2_hyb	Bowtie2_Aligater	STAR_default	STAR_new
both > 20	1101535	299407	1158981	1296412		161	50	210	269		2164	394	2039	2330
both > 15	1400504	299407	1854341	2315398		207	50	323	452		2991	394	4000	5218
no selection	1400504	299407	2215671	3192768		207	50	379	585		2991	394	5155	7639
ratio	Bowtie2_hyb	Bowtie2_Aligater	STAR_default	STAR_new		Bowtie2_hyb	Bowtie2_Aligater	STAR_default	STAR_new		Bowtie2_hyb	Bowtie2_Aligater	STAR_default	STAR_new
both > 20	0.345009	0.0937766	0.363002	0.406046		0.275214	0.0854701	0.358974	0.459829		0.283283	0.0515774	0.26692	0.305014
both > 15	0.438649	0.0937766	0.580794	0.725201		0.353846	0.0854701	0.552137	0.77265		0.391543	0.0515774	0.523629	0.683074
no selection	0.438649	0.0937766	0.693966	1		0.353846	0.0854701	0.647863	1		0.391543	0.0515774	0.674827	1
PARIS_bc08	All					ACTB					XIST
Raw reads	Bowtie2_hyb	Bowtie2_Aligater	STAR_default	STAR_new		Bowtie2_hyb	Bowtie2_Aligater	STAR_default	STAR_new		Bowtie2_hyb	Bowtie2_Aligater	STAR_default	STAR_new
both > 20	1206360	306689	1272053	1428973		155	39	237	264		2934	487	2776	3198
both > 15	1540922	306689	2037039	2539522		180	39	344	428		4093	487	5426	7012
no selection	1540922	306689	2422185	3460065		180	39	400	568		4093	487	6826	10053
ratio	Bowtie2_hyb	Bowtie2_Aligater	STAR_default	STAR_new		Bowtie2_hyb	Bowtie2_Aligater	STAR_default	STAR_new		Bowtie2_hyb	Bowtie2_Aligater	STAR_default	STAR_new
both > 20	0.348652	0.0886368	0.367638	0.41299		0.272887	5.16549	0.417254	0.464789		0.291853	0.0484433	0.276136	0.318114
both > 15	0.445345	0.0886368	0.588729	0.733952		0.316901	7.20599	0.605634	0.753521		0.407142	0.0484433	0.539739	0.697503
no selection	0.445345	0.0886368	0.70004	1		0.316901	7.20599	0.704225	1		0.407142	0.0484433	0.679001	1
PARIS_bc09	All					ACTB					XIST
Raw reads	Bowtie2_hyb	Bowtie2_Aligater	STAR_default	STAR_new		Bowtie2_hyb	Bowtie2_Aligater	STAR_default	STAR_new		Bowtie2_hyb	Bowtie2_Aligater	STAR_default	STAR_new
both > 20	2741652	668194	2873234	3244385		347	97	441	553		7998	1346	7456	8522
both > 15	3523863	668194	4661774	5877641		418	97	654	882		11106	1346	14645	19327
no selection	3523863	668194	5568352	8118715		418	97	781	1208		11106	1346	18724	28329
ratio	Bowtie2_hyb	Bowtie2_Aligater	STAR_default	STAR_new		Bowtie2_hyb	Bowtie2_Aligater	STAR_default	STAR_new		Bowtie2_hyb	Bowtie2_Aligater	STAR_default	STAR_new
both > 20	0.337695	0.0823029	0.353903	0.399618		0.287252	0.080298	0.365066	0.457781		0.282326	0.0475131	0.263193	0.300822
both > 15	0.434042	0.0823029	0.574201	0.723962		0.346026	0.080298	0.541391	0.730132		0.392036	0.0475131	0.516961	0.682234
no selection	0.434042	0.0823029	0.685866	1		0.346026	0.080298	0.646523	1		0.392036	0.0475131	0.660948	1

## Sheet: hiCLIP
hiCLIP-high	All					ACTB					XIST
Raw reads	Bowtie2_hyb	Bowtie2_Aligater	STAR_default	STAR_new		Bowtie2_hyb	Bowtie2_Aligater	STAR_default	STAR_new		Bowtie2_hyb	Bowtie2_Aligater	STAR_default	STAR_new
both > 20	11306	7038	17908	24736		5	0	11	14		31	25	35	53
both > 15	12783	7038	22017	32261		5	0	17	23		31	25	38	59
no selection	12783	7038	27176	39046		5	0	17	23		31	25	39	60
ratio	Bowtie2_hyb	Bowtie2_Aligater	STAR_default	STAR_new		Bowtie2_hyb	Bowtie2_Aligater	STAR_default	STAR_new		Bowtie2_hyb	Bowtie2_Aligater	STAR_default	STAR_new
both > 20	0.289556	0.180249	0.458639	0.633509		0.217391	0	0.478261	0.608696		0.516667	0.416667	0.583333	0.883333
both > 15	0.327383	0.180249	0.563873	0.826231		0.217391	0	0.73913	1		0.516667	0.416667	0.633333	0.983333
no selection	0.327383	0.180249	0.696	1		0.217391	0	0.73913	1		0.516667	0.416667	0.65	1
hiCLiP-low	All					ACTB					XIST
Raw reads	Bowtie2_hyb	Bowtie2_Aligater	STAR_default	STAR_new		Bowtie2_hyb	Bowtie2_Aligater	STAR_default	STAR_new		Bowtie2_hyb	Bowtie2_Aligater	STAR_default	STAR_new
both > 20	19805	12346	31956	44250		8	3	8	12		49	40	49	80
both > 15	21916	12346	37622	54546		8	3	9	14		49	40	54	90
no selection	21916	12346	42170	61258		8	3	10	15		49	40	54	94
ratio	Bowtie2_hyb	Bowtie2_Aligater	STAR_default	STAR_new		Bowtie2_hyb	Bowtie2_Aligater	STAR_default	STAR_new		Bowtie2_hyb	Bowtie2_Aligater	STAR_default	STAR_new
both > 20	0.323305	0.201541	0.521662	0.722355		0.533333	0.2	0.533333	0.8		0.521277	0.425532	0.521277	0.851064
both > 15	0.357766	0.201541	0.614157	0.890431		0.533333	0.2	0.6	0.933333		0.521277	0.425532	0.574468	0.957447
no selection	0.357766	0.201541	0.6884	1		0.533333	0.2	0.666667	1		0.521277	0.425532	0.574468	1

## Sheet: COMRADES
COMRADES_rep1	All					ACTB					XIST
Raw reads	Bowtie2_hyb	Bowtie2_Aligater	STAR_default	STAR_new		Bowtie2_hyb	Bowtie2_Aligater	STAR_default	STAR_new		Bowtie2_hyb	Bowtie2_Aligater	STAR_default	STAR_new
both > 20	214033	150778	250503	312277		564	449	664	828		0	0	0	0
both > 15	307185	150778	274440	424008		590	449	727	939		0	0	0	0
no selection	307185	150778	283841	444007		590	449	754	995		0	0	0	0
ratio	Bowtie2_hyb	Bowtie2_Aligater	STAR_default	STAR_new		Bowtie2_hyb	Bowtie2_Aligater	STAR_default	STAR_new		Bowtie2_hyb	Bowtie2_Aligater	STAR_default	STAR_new
both > 20	0.482049	0.339585	0.564187	0.703315		0.566834	0.451256	0.667337	0.832161		#DIV/0!	#DIV/0!	#DIV/0!	#DIV/0!
both > 15	0.691847	0.339585	0.618098	0.954958		0.592965	0.451256	0.730653	0.943719		#DIV/0!	#DIV/0!	#DIV/0!	#DIV/0!
no selection	0.691847	0.339585	0.639271	1		0.592965	0.451256	0.757789	1		#DIV/0!	#DIV/0!	#DIV/0!	#DIV/0!
COMRADES_rep2	All					ACTB					XIST
Raw reads	Bowtie2_hyb	Bowtie2_Aligater	STAR_default	STAR_new		Bowtie2_hyb	Bowtie2_Aligater	STAR_default	STAR_new		Bowtie2_hyb	Bowtie2_Aligater	STAR_default	STAR_new
both > 20	215317	151779	251333	313417		542	450	689	836		0	0	0	0
both > 15	308030	151779	275489	424632		557	450	744	929		0	0	0	0
no selection	308030	151779	284867	444674		557	450	772	992		0	0	0	0
ratio	Bowtie2_hyb	Bowtie2_Aligater	STAR_default	STAR_new		Bowtie2_hyb	Bowtie2_Aligater	STAR_default	STAR_new		Bowtie2_hyb	Bowtie2_Aligater	STAR_default	STAR_new
both > 20	0.484213	0.341326	0.565207	0.704824		0.546371	0.453629	0.694556	0.842742		#DIV/0!	#DIV/0!	#DIV/0!	#DIV/0!
both > 15	0.69271	0.341326	0.61953	0.954929		0.561492	0.453629	0.75	0.936492		#DIV/0!	#DIV/0!	#DIV/0!	#DIV/0!
no selection	0.69271	0.341326	0.64062	1		0.561492	0.453629	0.778226	1		#DIV/0!	#DIV/0!	#DIV/0!	#DIV/0!
COMRADES_rep3	All					ACTB					XIST
Raw reads	Bowtie2_hyb	Bowtie2_Aligater	STAR_default	STAR_new		Bowtie2_hyb	Bowtie2_Aligater	STAR_default	STAR_new		Bowtie2_hyb	Bowtie2_Aligater	STAR_default	STAR_new
both > 20	194743	132321	231950	294062		385	317	562	691		0	0	0	0
both > 15	292025	132321	256316	415969		405	317	613	762		0	0	0	0
no selection	292025	132321	266092	435753		405	317	633	818		0	0	0	0
ratio	Bowtie2_hyb	Bowtie2_Aligater	STAR_default	STAR_new		Bowtie2_hyb	Bowtie2_Aligater	STAR_default	STAR_new		Bowtie2_hyb	Bowtie2_Aligater	STAR_default	STAR_new
both > 20	0.446911	0.303661	0.532297	0.674836		0.47066	0.387531	0.687042	0.844743		#DIV/0!	#DIV/0!	#DIV/0!	#DIV/0!
both > 15	0.670162	0.303661	0.588214	0.954598		0.49511	0.387531	0.749389	0.93154		#DIV/0!	#DIV/0!	#DIV/0!	#DIV/0!
no selection	0.670162	0.303661	0.610649	1		0.49511	0.387531	0.773839	1		#DIV/0!	#DIV/0!	#DIV/0!	#DIV/0!

## Sheet: LIGR
LIGR_rep1	All					ACTB					XIST
Raw reads	Bowtie2_hyb	Bowtie2_Aligater	STAR_default	STAR_new		Bowtie2_hyb	Bowtie2_Aligater	STAR_default	STAR_new		Bowtie2_hyb	Bowtie2_Aligater	STAR_default	STAR_new
both > 20	1754979	1081910	1275051	2018912		122	66	277	326		1420	835	1382	1683
both > 15	1894684	1081910	1442451	2571833		122	66	296	368		1446	835	1481	1818
no selection	1894684	1081910	1474469	2739523		122	66	297	369		1446	835	1492	1875
ratio	Bowtie2_hyb	Bowtie2_Aligater	STAR_default	STAR_new		Bowtie2_hyb	Bowtie2_Aligater	STAR_default	STAR_new		Bowtie2_hyb	Bowtie2_Aligater	STAR_default	STAR_new
both > 20	0.640615	0.394926	0.465428	0.736957		0.330623	0.178862	0.750678	0.883469		0.757333	0.445333	0.737067	0.8976
both > 15	0.691611	0.394926	0.526534	0.938789		0.330623	0.178862	0.802168	0.99729		0.7712	0.445333	0.789867	0.9696
no selection	0.691611	0.394926	0.538221	1		0.330623	0.178862	0.804878	1		0.7712	0.445333	0.795733	1
LIGR_rep2	All					ACTB					XIST
Raw reads	Bowtie2_hyb	Bowtie2_Aligater	STAR_default	STAR_new		Bowtie2_hyb	Bowtie2_Aligater	STAR_default	STAR_new		Bowtie2_hyb	Bowtie2_Aligater	STAR_default	STAR_new
both > 20	2330728	1276666	1725469	3220049		179	124	242	337		2065	1311	2310	2864
both > 15	2550713	1276666	2185923	4895143		179	124	277	409		2244	1311	2526	3273
no selection	2550713	1276666	2257820	5320747		179	124	285	430		2244	1311	2579	3568
ratio	Bowtie2_hyb	Bowtie2_Aligater	STAR_default	STAR_new		Bowtie2_hyb	Bowtie2_Aligater	STAR_default	STAR_new		Bowtie2_hyb	Bowtie2_Aligater	STAR_default	STAR_new
both > 20	0.438045	0.239941	0.324291	0.605187		0.416279	0.288372	0.562791	0.783721		0.578756	0.367433	0.647422	0.802691
both > 15	0.47939	0.239941	0.41083	0.92001		0.416279	0.288372	0.644186	0.951163		0.628924	0.367433	0.70796	0.917321
no selection	0.47939	0.239941	0.424343	1		0.416279	0.288372	0.662791	1		0.628924	0.367433	0.722814	1

## Sheet: RIC
RIC_rep1	All					ACTB					XIST
Raw reads	Bowtie2_hyb	Bowtie2_Aligater	STAR_default	STAR_new		Bowtie2_hyb	Bowtie2_Aligater	STAR_default	STAR_new		Bowtie2_hyb	Bowtie2_Aligater	STAR_default	STAR_new
both > 20	1421447	1339556	2566843	2799704		35	32	122	127		0	0	0	0
both > 15	1468835	1339556	2686593	2923631		35	32	129	135		0	0	0	0
no selection	1468835	1339556	2742736	2981517		35	32	134	139		0	0	0	0
ratio	Bowtie2_hyb	Bowtie2_Aligater	STAR_default	STAR_new		Bowtie2_hyb	Bowtie2_Aligater	STAR_default	STAR_new		Bowtie2_hyb	Bowtie2_Aligater	STAR_default	STAR_new
both > 20	0.476753	0.449287	0.860918	0.93902		0.251799	0.230216	0.877698	0.913669		#DIV/0!	#DIV/0!	#DIV/0!	#DIV/0!
both > 15	0.492647	0.449287	0.901083	0.980585		0.251799	0.230216	0.928058	0.971223		#DIV/0!	#DIV/0!	#DIV/0!	#DIV/0!
no selection	0.492647	0.449287	0.919913	1		0.251799	0.230216	0.964029	1		#DIV/0!	#DIV/0!	#DIV/0!	#DIV/0!
RIC_rep2	All					ACTB					XIST
Raw reads	Bowtie2_hyb	Bowtie2_Aligater	STAR_default	STAR_new		Bowtie2_hyb	Bowtie2_Aligater	STAR_default	STAR_new		Bowtie2_hyb	Bowtie2_Aligater	STAR_default	STAR_new
both > 20	1500193	1422200	2669969	2910969		24	25	101	101		0	0	0	0
both > 15	1548478	1422200	2792728	3037861		24	25	110	112		0	0	0	0
no selection	1548478	1422200	2850381	3097363		24	25	120	121		0	0	0	0
ratio	Bowtie2_hyb	Bowtie2_Aligater	STAR_default	STAR_new		Bowtie2_hyb	Bowtie2_Aligater	STAR_default	STAR_new		Bowtie2_hyb	Bowtie2_Aligater	STAR_default	STAR_new
both > 20	0.484345	0.459165	0.862014	0.939822		0.198347	0.206612	0.834711	0.834711		#DIV/0!	#DIV/0!	#DIV/0!	#DIV/0!
both > 15	0.499934	0.459165	0.901647	0.980789		0.198347	0.206612	0.909091	0.92562		#DIV/0!	#DIV/0!	#DIV/0!	#DIV/0!
no selection	0.499934	0.459165	0.920261	1		0.198347	0.206612	0.991736	1		#DIV/0!	#DIV/0!	#DIV/0!	#DIV/0!

## Sheet: SPLASH
ESA	All					ACTB					XIST
Raw reads	Bowtie2_hyb	Bowtie2_Aligater	STAR_default	STAR_new		Bowtie2_hyb	Bowtie2_Aligater	STAR_default	STAR_new		Bowtie2_hyb	Bowtie2_Aligater	STAR_default	STAR_new
both > 20	583336	370270	1470539	1890926		408	286	2404	2856		0	0	0	0
both > 15	666620	370270	1703650	2200249		440	286	2884	3445		0	0	0	0
no selection	666620	370270	1831467	2367209		440	286	3174	3779		0	0	0	0
ratio	Bowtie2_hyb	Bowtie2_Aligater	STAR_default	STAR_new		Bowtie2_hyb	Bowtie2_Aligater	STAR_default	STAR_new		Bowtie2_hyb	Bowtie2_Aligater	STAR_default	STAR_new
both > 20	0.246424	0.156416	0.621212	0.7988		0.107965	0.0756814	0.636147	0.755755		#DIV/0!	#DIV/0!	#DIV/0!	#DIV/0!
both > 15	0.281606	0.156416	0.719687	0.92947		0.116433	0.0756814	0.763165	0.911617		#DIV/0!	#DIV/0!	#DIV/0!	#DIV/0!
no selection	0.281606	0.156416	0.773682	1		0.116433	0.0756814	0.839905	1		#DIV/0!	#DIV/0!	#DIV/0!	#DIV/0!
GMA	All					ACTB					XIST
Raw reads	Bowtie2_hyb	Bowtie2_Aligater	STAR_default	STAR_new		Bowtie2_hyb	Bowtie2_Aligater	STAR_default	STAR_new		Bowtie2_hyb	Bowtie2_Aligater	STAR_default	STAR_new
both > 20	336938	186920	308899	431869		1164	878	1940	2426		15	10	21	21
both > 15	374300	186920	354319	499015		1213	878	2233	2777		15	10	21	21
no selection	374300	186920	369064	524441		1213	878	2442	3060		15	10	21	21
ratio	Bowtie2_hyb	Bowtie2_Aligater	STAR_default	STAR_new		Bowtie2_hyb	Bowtie2_Aligater	STAR_default	STAR_new		Bowtie2_hyb	Bowtie2_Aligater	STAR_default	STAR_new
both > 20	0.642471	0.356418	0.589006	0.823484		0.380392	0.286928	0.633987	0.79281		0.714286	0.47619	1	1
both > 15	0.713712	0.356418	0.675613	0.951518		0.396405	0.286928	0.729739	0.907516		0.714286	0.47619	1	1
no selection	0.713712	0.356418	0.703728	1		0.396405	0.286928	0.798039	1		0.714286	0.47619	1	1
GMT	All					ACTB					XIST
Raw reads	Bowtie2_hyb	Bowtie2_Aligater	STAR_default	STAR_new		Bowtie2_hyb	Bowtie2_Aligater	STAR_default	STAR_new		Bowtie2_hyb	Bowtie2_Aligater	STAR_default	STAR_new
both > 20	333965	248712	600927	655106		23	17	87	99		12	6	18	19
both > 15	348523	248712	673058	744419		25	17	106	122		13	6	21	22
no selection	348523	248712	720630	810605		25	17	115	135		13	6	21	22
ratio	Bowtie2_hyb	Bowtie2_Aligater	STAR_default	STAR_new		Bowtie2_hyb	Bowtie2_Aligater	STAR_default	STAR_new		Bowtie2_hyb	Bowtie2_Aligater	STAR_default	STAR_new
both > 20	0.411995	0.306823	0.741331	0.808169		0.17037	0.125926	0.644444	0.733333		0.545455	0.272727	0.818182	0.863636
both > 15	0.429954	0.306823	0.830316	0.91835		0.185185	0.125926	0.785185	0.733333		0.590909	0.272727	0.954545	1
no selection	0.429954	0.306823	0.889003	1		0.185185	0.125926	0.851852	1		0.590909	0.272727	0.954545	1
