# Supplementary material for: Classification and clustering of RNA crosslink-ligation data reveal complex structures and homodimers
Source: HighWire-hosted journal article supplement (doi:10.1101/gr.275979.121), 2022-03-24
Supplement: Supplemental_Data.zip [file fig3E.xlsx]

## Sheet: PARIS_HEK
Before reverse soft clips
	total reads	total alignments	cont.sam	gap1.sam	gapm.sam	trans.sam	homo.sam	bad.sam
bc07	20210535	20168255	16858911	2587159	20122	687180	10802	4081
bc08	22659233	22607456	18929918	2812168	20681	828214	12183	4292
bc09	56829056	56687891	47924352	6509572	43195	2171474	26339	12959
bc10	41226590	41085389	35535386	4208658	27487	1285322	16503	12033
bc11	36259154	36175602	31233213	3690688	25708	1201226	16675	8092
bc12	39154189	39031712	34256876	3256892	17902	1477021	13820	9201
After reverse soft clips	After reverse soft clips								Ratio
	total reads	total alignments	cont.sam	gap1.sam	gapm.sam	trans.sam	homo.sam	bad.sam		cont.sam	gap1.sam	gapm.sam	trans.sam	homo.sam	bad.sam
bc07	8050147	8050136	6711424	979786	5025	351476	1052	1373	bc07	0.770018	0.176489	0.00124425	0.0513918	0.000586526	0.000269859
bc08	9374503	9374488	7900599	1040603	5031	425758	1042	1455	bc08	0.772657	0.170031	0.00113473	0.0553404	0.000583647	0.000253627
bc09	23971241	23971174	20220391	2586470	11044	1146625	2426	4218	bc09	0.77979	0.16006	0.000954424	0.0583874	0.000506167	0.000302257
bc10	15132602	15132557	12858872	1608211	6556	654352	1406	3160	bc10	0.810227	0.141095	0.000825753	0.0470491	0.000434404	0.000368524
bc11	14786935	14786901	12778358	1363493	6374	634489	1576	2611	bc11	0.808299	0.13939	0.000884797	0.0506276	0.000503349	0.000295181
bc12	16446388	16446339	14482055	1166234	4198	789342	1436	3074	bc12	0.827883	0.112967	0.000564435	0.057883	0.000389639	0.000313504

## Sheet: PARIS_mES
Before reverse soft clips
PARIS	total reads	total alignments	cont.sam	gap1.sam	gapm.sam	trans.sam	homo.sam	bad.sam
bc01	28405622	28375297	21900277	5068698	45952	1218003	17235	125132
bc02	47963341	47908996	36984436	8550989	77330	2058302	30415	207524
bc03	43977940	43936792	34231431	7442872	62442	1990263	29917	179867
After reverse soft clips	After reverse soft clips								Ratio
	softreverse fq	total alignments	cont.sam	gap1.sam	gapm.sam	trans.sam	homo.sam	bad.sam		cont.sam	gap1.sam	gapm.sam	trans.sam	homo.sam	bad.sam
bc01	11801854	11798535	9279386	1766065	14503	607539	10831	120211	bc01	0.683367	0.240613	0.00212828	0.0642669	0.000988044	0.00863713
bc02	20137309	20131182	15929772	2955064	24122	1042450	16811	162963	bc02	0.684635	0.239893	0.0021152	0.0646484	0.000984627	0.00772438
bc03	18537221	18532091	14814329	2511941	19512	1013465	25444	147400	bc03	0.694776	0.226359	0.00186353	0.0683008	0.00125884	0.00744162

## Sheet: LIGR
Before reverse soft clips
LIGR	total reads	total alignments	cd E	gap1.sam	gapm.sam	trans.sam	homo.sam	bad.sam
LIGR_rep1	71525547	71454408	57291721	5300993	188642	6718447	1630709	323896
LIGR_rep2	94284281	94127662	76775409	8110624	291604	6608343	1753130	588552
After reverse soft clips	After reverse soft clips								Ratio
LIGR	softreverse fq	total alignments	cont.sam	gap1.sam	gapm.sam	trans.sam	homo.sam	bad.sam		cont.sam	gap1.sam	gapm.sam	trans.sam	homo.sam	bad.sam
LIGR_rep1	27106962	27098633	22403631	1051465	7264	3116235	394924	125114	LIGR_rep1	0.73635	0.0888138	0.00273897	0.137499	0.0283204	0.00627762
LIGR_rep2	33821899	33809492	27570821	2290790	21032	3303292	413072	210485	LIGR_rep2	0.749789	0.11032	0.00331589	0.105125	0.0229752	0.00847476

## Sheet: COMRADES
Before reverse soft clips
COMRADES	total reads	total alignments	cont.sam	gap1.sam	gapm.sam	trans.sam	homo.sam	bad.sam
rep1	24115890	24098196	19944867	1415157	45421	2672587	5968	14196
rep2	24148945	24130953	19962434	1419114	45941	2683358	5820	14286
rep3	26624187	26605554	22058115	1507063	42785	2977797	5285	14509
rep4	26804185	26785429	22196820	1519797	43509	3005542	5223	14538
rep5	19733033	19717865	16236176	1089668	31498	2344723	3579	12221
rep6	20097078	20081583	16528026	1111908	32626	2392887	3588	12548
After reverse soft clips	After reverse soft clips								Ratio
	softreverse fq	total alignments	cont.sam	gap1.sam	gapm.sam	trans.sam	homo.sam	bad.sam		cont.sam	gap1.sam	gapm.sam	trans.sam	homo.sam	bad.sam
rep1	18476344	18469985	16578547	91559	862	1794658	596	3763	rep1	0.749345	0.0624781	0.00191919	0.185241	0.000272186	0.000744696
rep2	18493172	18486857	16589117	91489	931	1800926	594	3800	rep2	0.748798	0.0625536	0.00194095	0.185693	0.000265602	0.000748935
rep3	20380541	20374090	18258830	96143	757	2014024	586	3750	rep3	0.74975	0.0602161	0.00163543	0.187492	0.000220514	0.000685805
rep4	20514457	20507971	18373592	97144	787	2031832	612	4004	rep4	0.749181	0.0603242	0.00165258	0.187932	0.00021769	0.000691758
rep5	15081990	15076538	13416346	74926	641	1580284	446	3895	rep5	0.739428	0.0590175	0.00162869	0.198905	0.000203973	0.000816702
rep6	15357632	15352156	13657317	76362	663	1613097	455	4262	rep6	0.738848	0.0591265	0.00165641	0.199332	0.000201174	0.00083644

## Sheet: hiCLiP
Before reverse soft clips
hiCLiP	total reads	total alignments	cont.sam	gap1.sam	gapm.sam	trans.sam	homo.sam	bad.sam
hiCLiP_low	1027438	1025719	858644	101144	2232	61100	209	2390
hiCLiP_high	953251	951774	807986	82088	2052	57478	173	1997
After reverse soft clips	After reverse soft clips								Ratio
hiCLiP	softreverse fq	total alignments	cont.sam	gap1.sam	gapm.sam	trans.sam	homo.sam	bad.sam		cont.sam	gap1.sam	gapm.sam	trans.sam	homo.sam	bad.sam
hiCLiP_low	268308	268229	194831	17055	179	55517	141	506	hiCLiP_low	0.765949	0.115042	0.00234661	0.113503	0.000340653	0.00281866
hiCLiP_high	281524	281436	211803	10091	116	58945	120	361	hiCLiP_high	0.776112	0.0966996	0.00227432	0.122133	0.000307369	0.00247364

## Sheet: SPLASH
Before reverse soft clips
COMRADES	total reads	total alignments	cont.sam	gap1.sam	gapm.sam	trans.sam	homo.sam	bad.sam
ESA	159412735	159383357	114105095	41506710	2097416	1513031	25858	135247
GMA	53371012	53368911	41269472	10485531	468324	1083749	18979	42856
GMT	45400893	45400555	41918199	3223440	49549	181950	21256	6161
After reverse soft clips	After reverse soft clips								Ratio
	softreverse fq	total alignments	cont.sam	gap1.sam	gapm.sam	trans.sam	homo.sam	bad.sam		cont.sam	gap1.sam	gapm.sam	trans.sam	homo.sam	bad.sam
ESA	10815905	10815536	9544381	762012	6564	492339	3303	6937	ESA	0.707994	0.265153	0.0131983	0.0125797	0.000182928	0.000891924
GMA	37568350	37567666	36883562	170260	2054	506783	1033	3974	GMA	0.760478	0.199655	0.00881336	0.0298014	0.00037496	0.000877443
GMT	1110057	1110013	937522	102715	1140	66381	1880	375	GMT	0.919498	0.0732619	0.00111648	0.00546974	0.000509594	0.000143962
