# Supplementary material for: Classification and clustering of RNA crosslink-ligation data reveal complex structures and homodimers
Source: HighWire-hosted journal article supplement (doi:10.1101/gr.275979.121), 2022-03-24
Supplement: Supplemental_Data.zip [file sfig13B&E.xlsx]

## Sheet: US47 homo
distance (nt)	reads
-40	2
-38	8
-36	11
-34	25
-32	45
-30	51
-28	61
-26	66
-24	98
-22	153
-20	182
-18	171
-16	106
-14	77
-12	66
-10	81
-8	76
-6	90
-4	305
-2	0

## Sheet: US47 gap1
distance (nt)	reads
0	0
5	31215
10	6480
15	4943
20	3767
25	4545
30	2678
35	2354
40	1996
45	1820
50	1710
55	1745
60	1366
65	1240
70	1593
75	1189
80	997
85	881
90	877
95	781
100	905
105	854
110	1386
115	742
120	735
125	803
130	880
135	648
140	687
145	714
150	661
155	715
160	712
165	619
170	989
175	648
180	551
185	604
190	480
195	429
200	454
205	509
210	506
215	445
220	455
225	395
230	339
235	364
240	342
245	311
250	307
255	331
260	282
265	313
270	237
275	263
280	321
285	277
290	280
295	319
300	309

## Sheet: VR1197 homo
distance (nt)	reads
-40	1
-38	2
-36	3
-34	6
-32	17
-30	23
-28	34
-26	40
-24	50
-22	97
-20	76
-18	67
-16	37
-14	45
-12	40
-10	38
-8	26
-6	88
-4	279
-2	0

## Sheet: VR1197 gap1
distance (nt)	reads
0	0
5	76496
10	4334
15	2206
20	1923
25	2139
30	1470
35	1351
40	1303
45	1349
50	1001
55	985
60	803
65	790
70	644
75	597
80	457
85	529
90	478
95	456
100	613
105	504
110	547
115	545
120	568
125	614
130	513
135	405
140	351
145	493
150	733
155	336
160	364
165	345
170	324
175	278
180	294
185	316
190	432
195	208
200	199
205	214
210	278
215	210
220	206
225	243
230	197
235	208
240	253
245	259
250	329
255	209
260	195
265	155
270	183
275	226
280	227
285	196
290	171
295	160
300	155
