# Supplementary material for: Classification and clustering of RNA crosslink-ligation data reveal complex structures and homodimers
Source: HighWire-hosted journal article supplement (doi:10.1101/gr.275979.121), 2022-03-24
Supplement: Supplemental_Data.zip [file sfig14.xlsx]

## Sheet: sfig14C upper
sfig14C
Vol. (Int.)	-AMT	+AMT
rep1	4643725	20836669
rep2	6886230	26980685
Avergae	5.76498e+06
fold change	-AMT	+AMT
rep1	0.805506	3.61435
rep2	1.19449	4.6801

## Sheet: sfig14C bottom
sfig14C
Vol. (Int.)	-Mth	+Mth
rep1	7618125	15973710
rep2	6269430	24331845
Avergae	6.94378e+06
fold change	-AMT	+AMT
rep1	1.09712	2.30044
rep2	0.902885	3.50412
